# Supplementary material for: The Polycomb system sustains promoters in a deep OFF state by limiting pre-initiation complex formation to counteract transcription
Source: PubMed Central journal article supplement (PMC11469961; doi:10.1038/s41556-024-01493-w), 2024-09-11

## Source Data File

**The Polycomb system sustains promoters in a deep OFF-state  
by limiting pre-initiation complex formation to counteract  
transcription**

*A. Szczurek, E. Dimitrova, J. Kelley, N. Blackledge & R. Klose*

## Raw blot images

Figure 2c

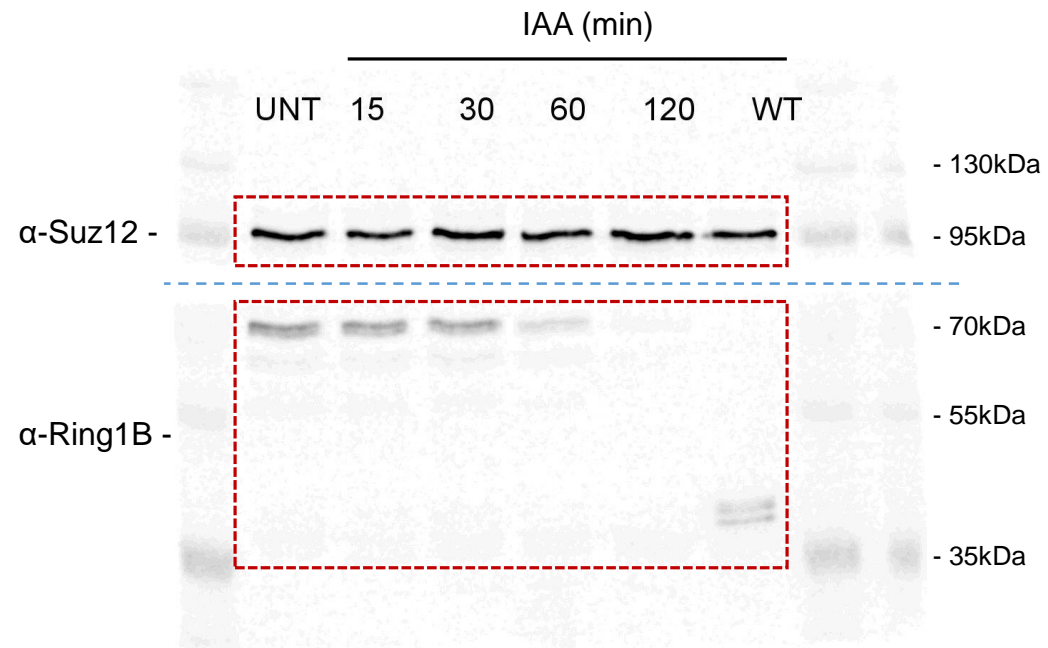

Figure 5b,d

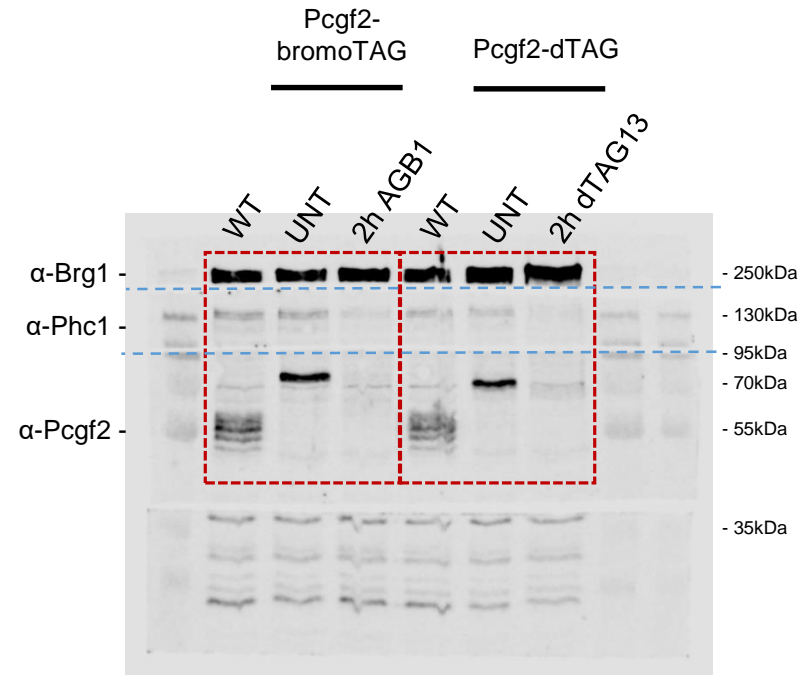

**Figure 6d**

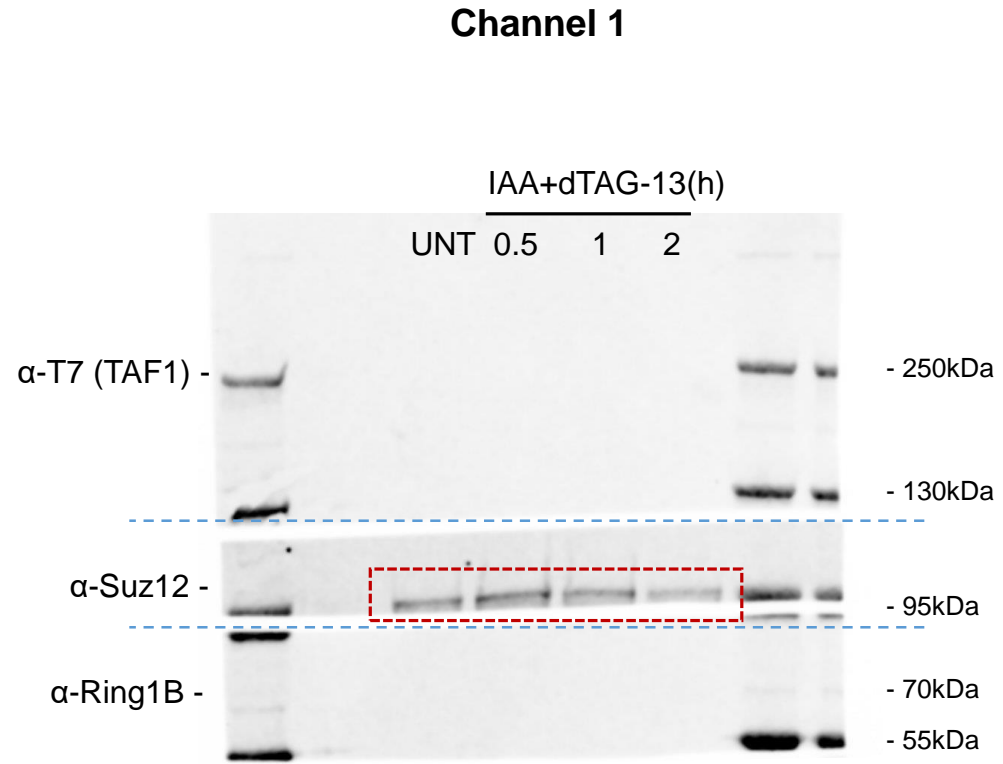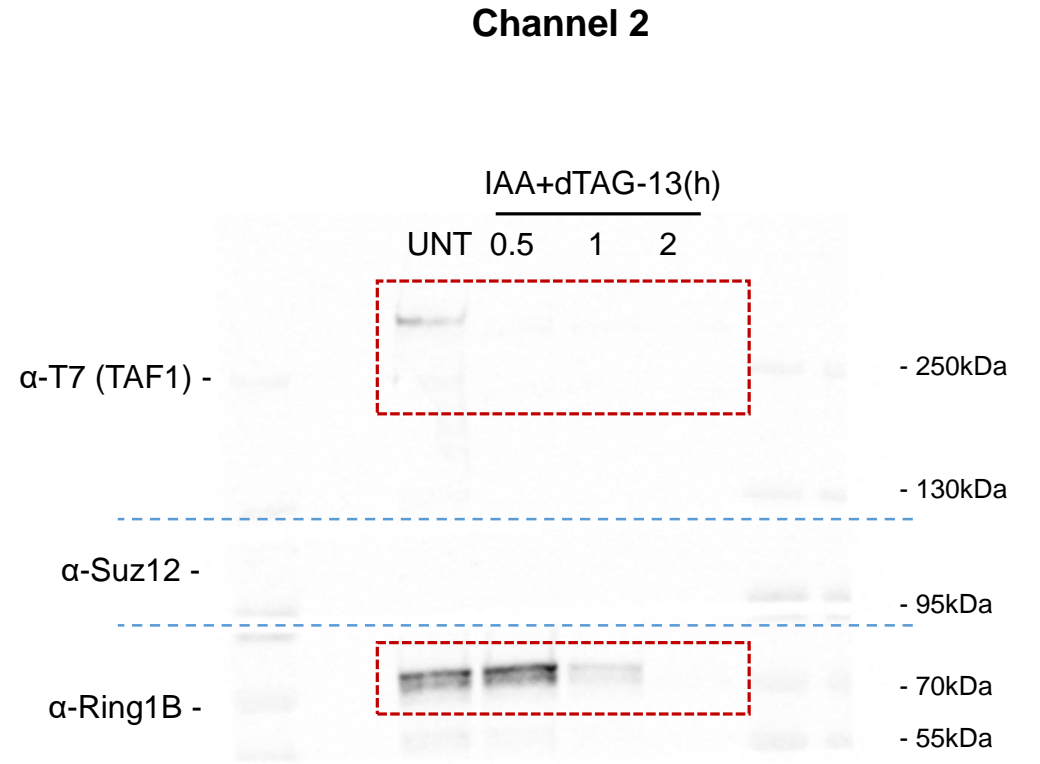

# Extended Data Figure 1a

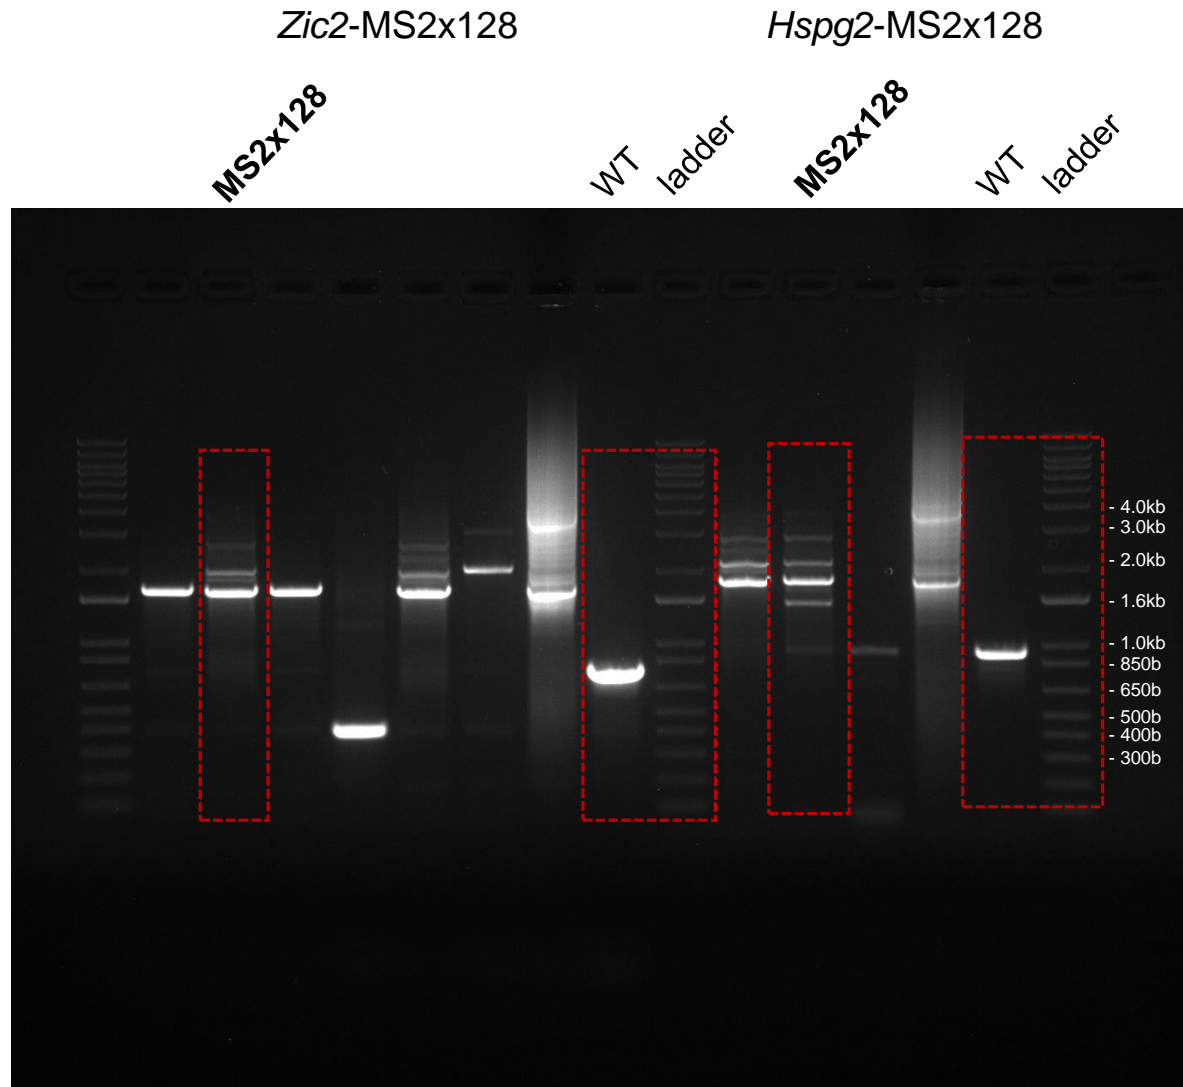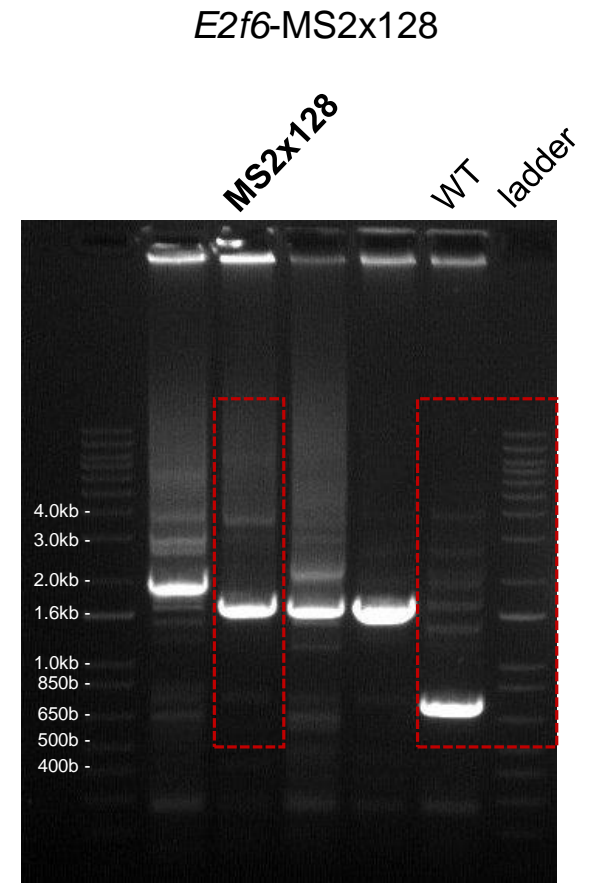

# Extended Data Figure 5a – part 1/2

## HT-dTAG-TAF1

## HT-TBP

## HT-TAF11

## HT-TFIIB

## T7-HT-Med14

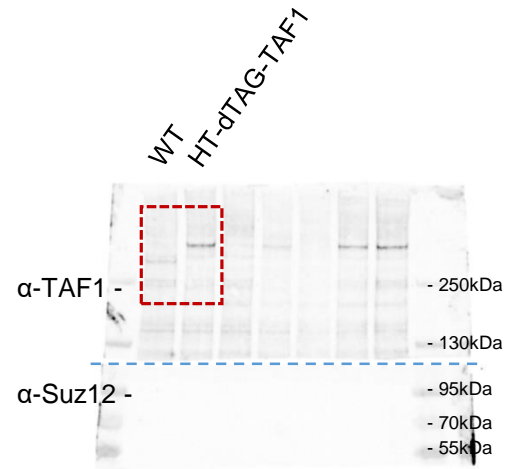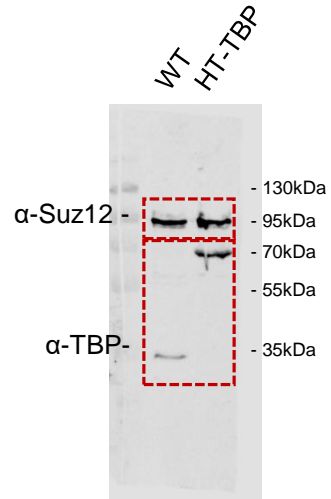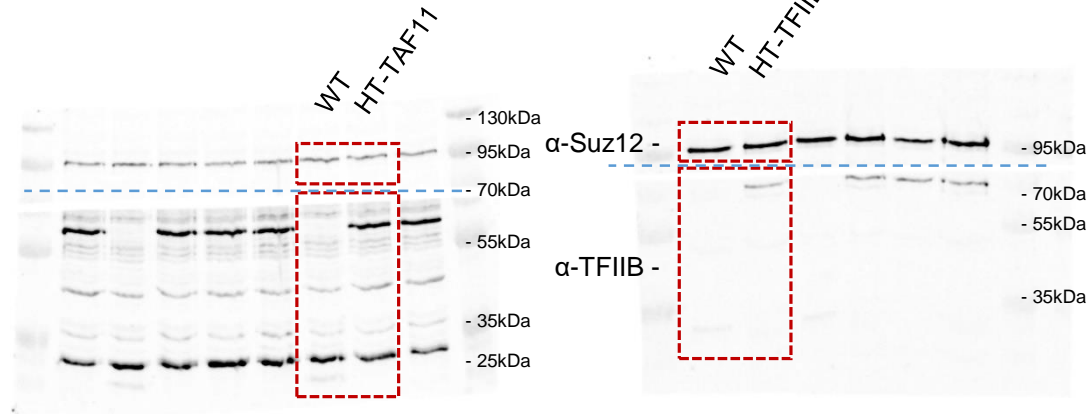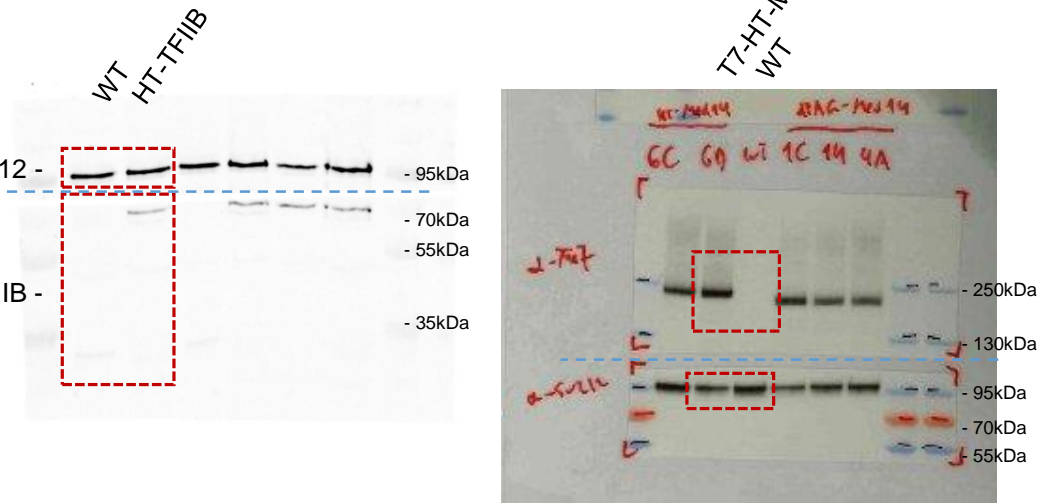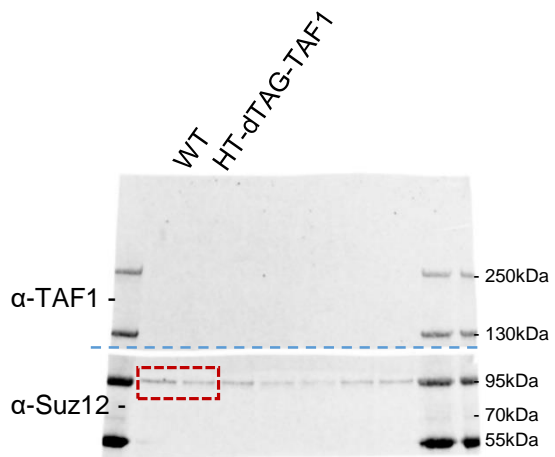

n.a.

n.a.

n.a.

n.a.

# Extended Data Figure 5a – part 2/2

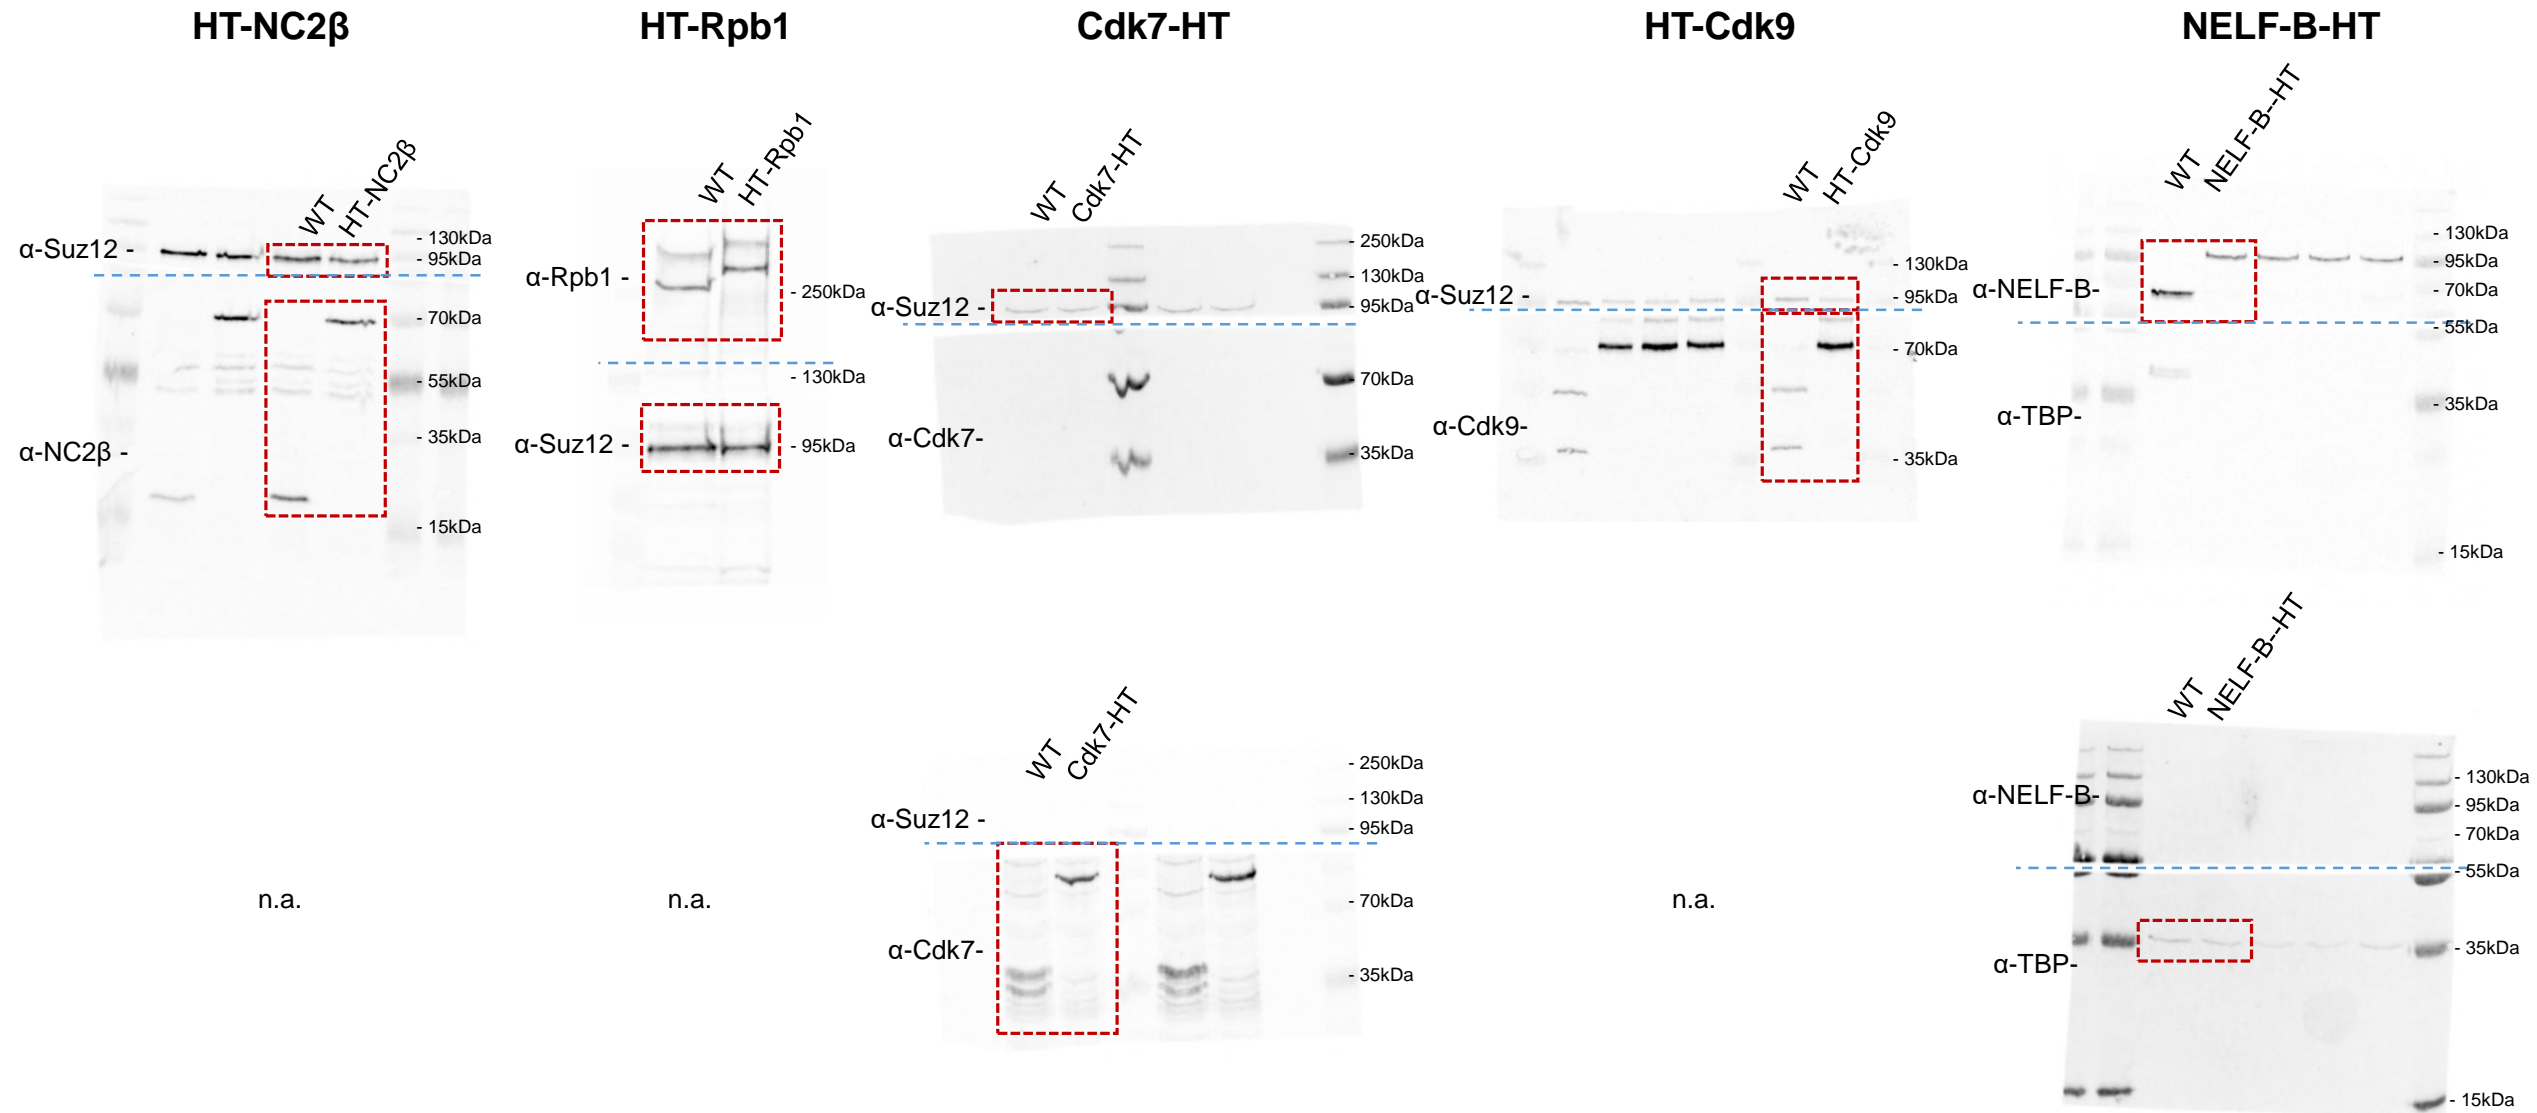

Supplement: 41556_2024_1493_MOESM18_ESM.pdf [file 41556_2024_1493_MOESM18_ESM.pdf]
